# Supplementary material for: The effect of cysteine oxidation on DJ-1 cytoprotective function in human alveolar type II cells
Source: PubMed Central journal article supplement (PMC6717737; doi:10.1038/s41419-019-1833-5), 2019-09-02
Supplement: 41419_2019_1833_MOESM1_ESM.pdf [file 41419_2019_1833_MOESM1_ESM.pdf]

## Supplementary Materials and Methods

### The effect of cysteine oxidation on DJ-1 cytoprotective function in human alveolar type II cells

Karim Bahmed<sup>1,2#</sup>, Samia Boukhenouna<sup>1,2#</sup>, Loukmane Karim<sup>1,2</sup>, Tessa Andrews<sup>3</sup>, Jiusheng Lin<sup>3</sup>, Robert Powers<sup>3,4,5</sup>, Mark A. Wilson<sup>3,5</sup>, Chih-Ru Lin<sup>1,2</sup>, Elise Messier<sup>6</sup>, Nichole Reisdorph<sup>6</sup>, Roger L. Powell<sup>6</sup>, Hsin-Yao Tang<sup>7</sup>, Robert J. Mason<sup>6</sup>, Gerard J. Criner<sup>1,2</sup>, Beata Kosmider<sup>1,2,8,\*</sup>

<sup>1</sup>Department of Thoracic Medicine and Surgery, Temple University, Philadelphia, PA 19140

<sup>2</sup>Center for Inflammation, Translational and Clinical Lung Research, Temple University, Philadelphia, PA 19140

<sup>3</sup>University of Nebraska, Lincoln, NE 68588

<sup>4</sup>Nebraska Center for Integrated Biomolecular Communication, University of Nebraska, Lincoln, NE 68588

<sup>5</sup>Redox Biology Center, University of Nebraska, Lincoln, NE 68588

<sup>6</sup>National Jewish Health, Denver, CO, 80206

<sup>7</sup>The Wistar Institute, Philadelphia, PA 19104

<sup>8</sup>Department of Physiology, Temple University, Philadelphia, PA 19140

# These authors contributed equally to this work

\* Correspondence:

Beata Kosmider, PhD or Karim Bahmed, PhD  
Department of Thoracic Medicine and Surgery  
Center for Inflammation, Translational and Clinical Lung Research  
Temple University  
3500 N. Broad Street  
Philadelphia, PA 19140  
E-mail: [beata.kosmider@temple.edu](mailto:beata.kosmider@temple.edu)

**Supplementary Table 1.** Primers used to analyze mRNA expression by RT-PCR, mtDNA amount and mtDNA damage by qPCR.

| <b>Gene</b>                |   | <b>Primer's sequence (5'-3')</b> |
|----------------------------|---|----------------------------------|
| GAPDH                      | F | GGAGCGAGATCCCTCCAAAAT            |
|                            | R | GGCTGTTGTCATACTTCTCATGG          |
| DJ-1                       | F | GTAGCCGTGATGTGGTCATT             |
|                            | R | CTGTGCGCCCAGATTACC               |
| ND1                        | F | CCGAATCACCTGACGGTTCA             |
|                            | R | TCTGGCTGCTTCTGAATCCC             |
| Short mtDNA fragment       | F | GAATTAAGTAGAAATAACTTTGCAAGG      |
|                            | R | CCAGCTATCACCAGGCTC               |
| Long mtDNA fragment        | F | ACAAAGAACCCTAACACCAGC            |
|                            | R | TGTTGAGCTTGAACGCTTTC             |
| Short nuclear DNA fragment | F | TGCTGTCTCCATGTTTGATGTATCT        |
|                            | R | TCTCTGCTCCCCACCTCTAAGT           |
